# Supplementary material for: A DFT prediction of two-dimensional MB3 (M = V, Nb, and Ta) monolayers as excellent anode materials for lithium-ion batteries
Source: Royal Society of Chemistry journal article supplement (doi:10.1039/d2ra05111g), 2022-01-01
Supplement: d2ra05111g1.pdf [file d2ra05111g1.pdf]

Electronic Supplementary Information for  
A DFT prediction of the two-dimensional MB<sub>3</sub> (M = V, Nb, and Ta)  
monolayers as excellent anode materials for lithium-ion batteries

**Jiahui Wang, Lina Bai,\* Xiangru Zhao, Hong Gao, Li Niu**

Key Laboratory for Photonic and Electronic Bandgap Materials, Ministry of Education,  
School of Physics and Electronic Engineering, Harbin Normal University, Harbin  
150025, China

---

\* Corresponding author: Lina Bai; Email: shidabailina@163.com

## **Computational Details of CALYPSO**

The particle swarm optimization (PSO) method within the evolutionary algorithm as implemented in the CALYPSO code was employed to find the low-energy structures of the  $\text{VB}_3$  monolayers. The ratio of V atoms to B atoms is 1 to 3. Each generation produces 20 structures for a total of 30 generations. In most cases, structural searching simulations for each calculation were stopped after generating 500 structures. The vacuum layer was set above 20 Å to ensure that the searched structure was free of layer interactions. The local optimization of the structure is divided into three steps, and the accuracy increases gradually to ensure that each generated structure can be fully optimized.

Table S1 The cohesive energies of the MB<sub>3</sub> monolayers by different vdW corrections.

|        | Cohesive Energy (eV/atom) |                  |                  |
|--------|---------------------------|------------------|------------------|
|        | VB <sub>3</sub>           | NbB <sub>3</sub> | TaB <sub>3</sub> |
| no vdW | – 0.65                    | – 0.66           | – 0.65           |
| D2     | – 0.51                    | – 0.47           | – 0.39           |
| D3     | – 0.63                    | – 0.62           | – 0.58           |
| D3-BJ  | – 0.63                    | – 0.61           | – 0.61           |

Table S2 The adsorption energies of MB<sub>3</sub>Li<sub>0.5</sub> under GGA-PBE without vdW correction.

|                  | Adsorption Energy (eV) |                |         |             |         |
|------------------|------------------------|----------------|---------|-------------|---------|
|                  | S1                     | S2             | S3      | S4          | S5      |
| VB <sub>3</sub>  | – <b>0.807</b>         | – 0.366        | – 0.048 | – 0.048(S3) | – 0.108 |
| NbB <sub>3</sub> | – 0.443                | – <b>0.634</b> | – 0.307 | – 0.619(S5) | – 0.619 |
| TaB <sub>3</sub> | – 0.319                | – <b>0.561</b> | – 0.205 | – 0.527(S5) | – 0.527 |

Table S3 The adsorption energies of MB<sub>3</sub>Li<sub>0.5</sub> under GGA-PBE with D3 correction.

|                  | Adsorption Energy (eV) |         |         |             |                |
|------------------|------------------------|---------|---------|-------------|----------------|
|                  | S1                     | S2      | S3      | S4          | S5             |
| VB <sub>3</sub>  | – <b>1.146</b>         | – 0.687 | – 0.355 | – 0.355(S3) | – 0.417        |
| NbB <sub>3</sub> | – 0.601                | – 0.744 | – 0.417 | – 0.767(S5) | – <b>0.767</b> |
| TaB <sub>3</sub> | – 0.455                | – 0.662 | – 0.249 | – 0.670(S5) | – <b>0.670</b> |

Table S4 The adsorption energies of MB<sub>3</sub>Li<sub>0.5</sub> under GGA-PBE with D3-BJ correction.

|                  | Adsorption Energy (eV) |                |         |             |         |
|------------------|------------------------|----------------|---------|-------------|---------|
|                  | S1                     | S2             | S3      | S4          | S5      |
| VB <sub>3</sub>  | – <b>1.114</b>         | – 0.624        | – 0.292 | – 0.292(S3) | – 0.343 |
| NbB <sub>3</sub> | – 0.583                | – <b>0.743</b> | – 0.389 | – 0.737(S5) | – 0.737 |
| TaB <sub>3</sub> | – 0.436                | – <b>0.668</b> | – 0.287 | – 0.636(S5) | – 0.636 |

Table S5 The adsorption energies ( $E_{\text{ads}}$ , unit: eV) of MB<sub>3</sub>Li<sub>*n*</sub> (*n* = 1, 2, 3 and 4).

| <i>n</i> | $E_{\text{ads}}$                       |                                         |                                         |
|----------|----------------------------------------|-----------------------------------------|-----------------------------------------|
|          | VB <sub>3</sub> Li <sub><i>n</i></sub> | NbB <sub>3</sub> Li <sub><i>n</i></sub> | TaB <sub>3</sub> Li <sub><i>n</i></sub> |
| 1        | – 0.968                                | – 0.645                                 | – 0.702                                 |
| 2        | – 0.566                                | – 0.771                                 | – 0.873                                 |

|   |         |         |         |
|---|---------|---------|---------|
| 3 | − 0.434 | − 0.457 | − 0.521 |
| 4 | − 0.317 | − 0.373 | − 0.423 |

Table S6 The lattice constants ( $a$ ,  $b$ , unit: Å), in-plane strain ( $\Delta a$  and  $\Delta b$ ), layer thickness ( $h$ , unit: Å) and out-of-plane strain ( $\Delta h$ ) for  $\text{VB}_3\text{Li}_n$  ( $n = 1, 2, 3$  and  $4$ ).

| $n$ | $\text{VB}_3\text{Li}_n$ |            |       |            |       |            |
|-----|--------------------------|------------|-------|------------|-------|------------|
|     | $a$                      | $\Delta a$ | $b$   | $\Delta b$ | $h$   | $\Delta h$ |
| 1   | 7.553                    | − 3.620 %  | 5.980 | − 1.013 %  | 3.423 | 3.608 %    |
| 2   | 7.699                    | − 1.765 %  | 5.960 | 0.679 %    | 3.375 | 2.155 %    |
| 3   | 7.658                    | − 2.228 %  | 5.964 | 0.751 %    | 3.362 | 1.755 %    |
| 4   | 7.680                    | − 2.008 %  | 5.932 | 0.022 %    | 3.369 | 1.961 %    |

Table S7 The lattice constants ( $a$ ,  $b$ , unit: Å), in-plane strain ( $\Delta a$  and  $\Delta b$ ), layer thickness ( $h$ , unit: Å) and out-of-plane strain ( $\Delta h$ ) for  $\text{NbB}_3\text{Li}_n$  ( $n = 1, 2, 3$  and  $4$ ).

| $n$ | $\text{NbB}_3\text{Li}_n$ |            |       |            |       |            |
|-----|---------------------------|------------|-------|------------|-------|------------|
|     | $a$                       | $\Delta a$ | $b$   | $\Delta b$ | $h$   | $\Delta h$ |
| 1   | 9.847                     | 1.734 %    | 5.911 | − 0.903 %  | 3.114 | 1.051 %    |
| 2   | 9.803                     | 1.288 %    | 5.923 | − 0.709 %  | 3.228 | 4.737 %    |
| 3   | 9.797                     | 1.222 %    | 5.929 | − 0.598 %  | 3.168 | 2.790 %    |
| 4   | 9.803                     | 1.286 %    | 5.918 | − 0.788 %  | 3.187 | 3.413 %    |

Table S8 The lattice constants ( $a$ ,  $b$ , unit: Å), in-plane strain ( $\Delta a$  and  $\Delta b$ ), layer thickness ( $h$ , unit: Å) and out-of-plane strain ( $\Delta h$ ) for  $\text{TaB}_3\text{Li}_n$  ( $n = 1, 2, 3$  and  $4$ ).

| $n$ | $\text{TaB}_3\text{Li}_n$ |            |       |            |       |            |
|-----|---------------------------|------------|-------|------------|-------|------------|
|     | $a$                       | $\Delta a$ | $b$   | $\Delta b$ | $h$   | $\Delta h$ |
| 1   | 9.816                     | 1.537 %    | 5.874 | − 1.422 %  | 3.112 | 1.348 %    |
| 2   | 9.751                     | 0.867 %    | 5.885 | − 1.230 %  | 3.243 | 5.607 %    |
| 3   | 9.746                     | 0.816 %    | 5.892 | − 1.109 %  | 3.186 | 3.758 %    |
| 4   | 9.761                     | 0.968 %    | 5.885 | − 1.233 %  | 3.186 | 3.758 %    |

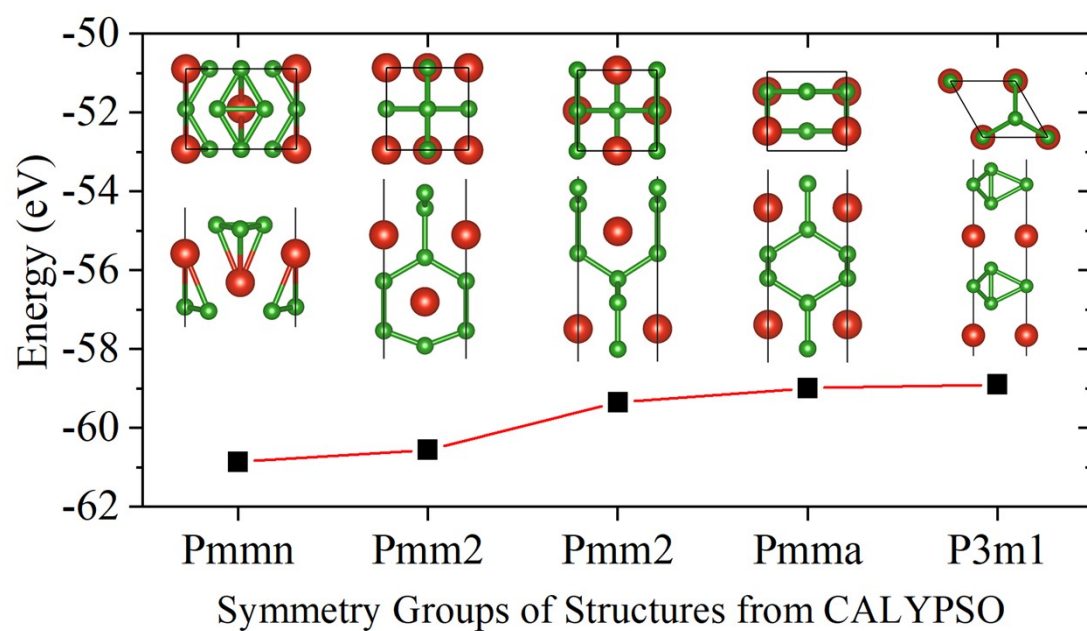

Fig. S1 The low-energy structures obtained by CALYPSO and the energies calculated by VASP. The upper and lower structural diagrams represent the top and side views of the corresponding structures, respectively.

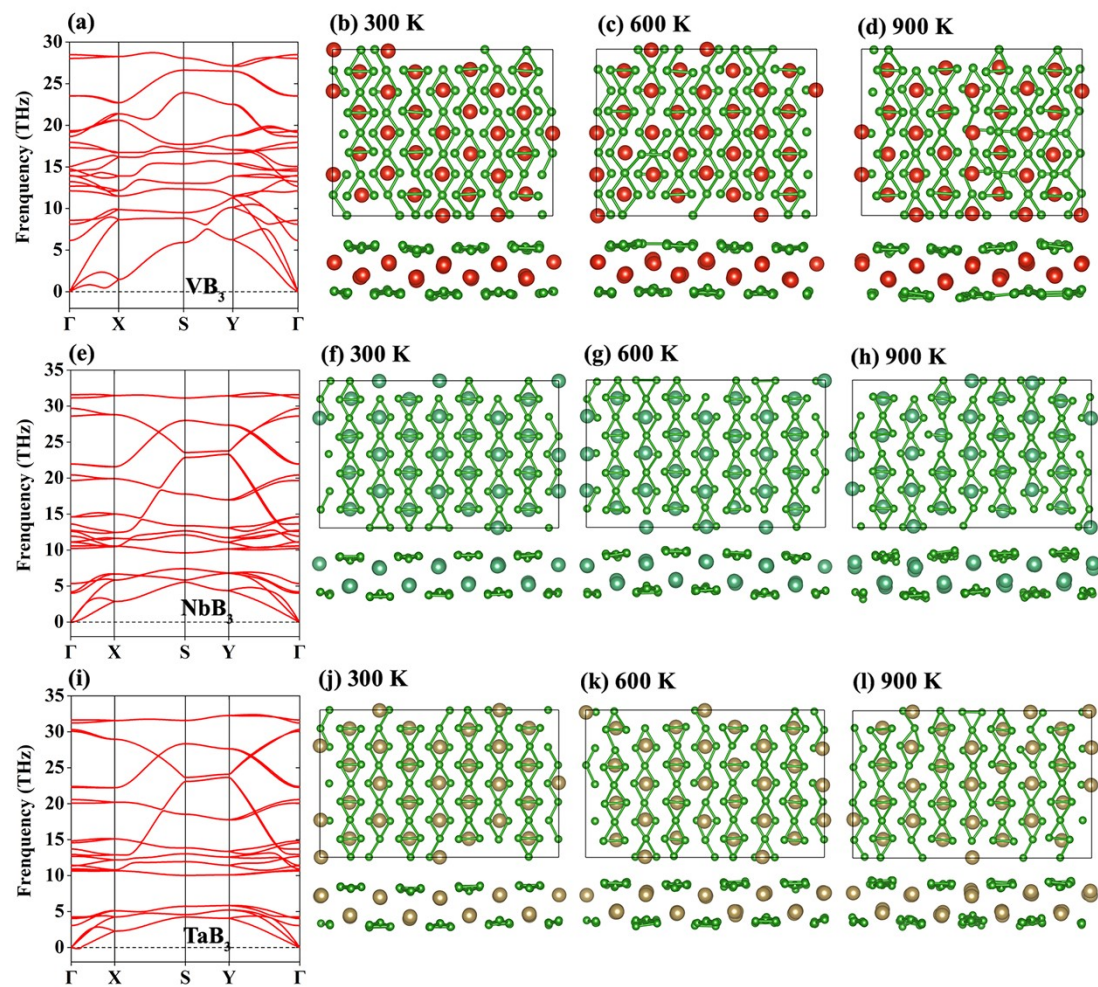

Fig. S2 The phonon dispersion curves and AIMD snapshots of the  $\text{VB}_3$ ,  $\text{NbB}_3$  and  $\text{TaB}_3$  monolayers.

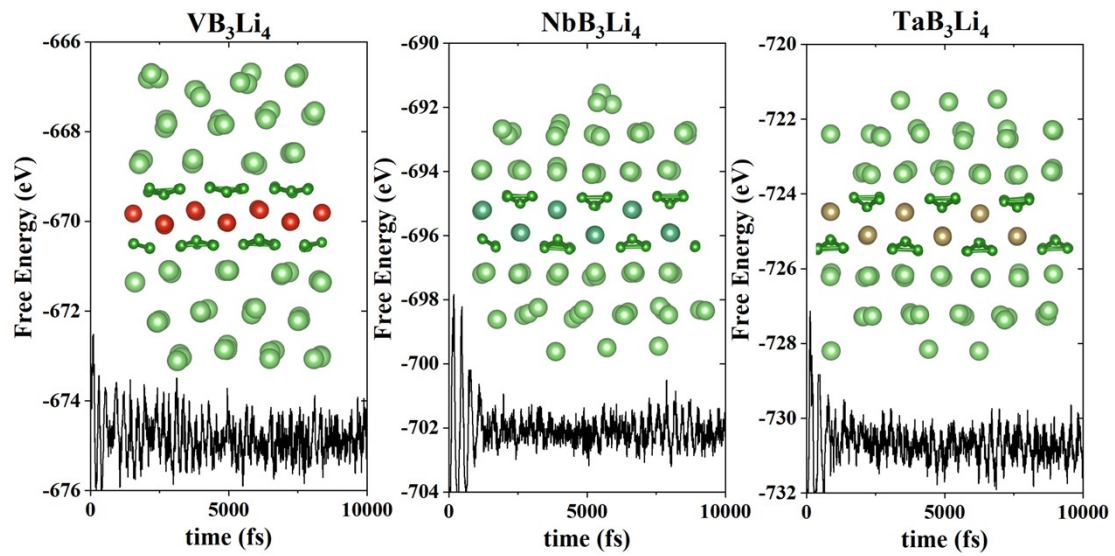

Fig. S3 The snapshots and energy curves of AIMD for  $\text{VB}_3\text{Li}_4$ ,  $\text{NbB}_3\text{Li}_4$  and  $\text{TaB}_3\text{Li}_4$  monolayers at 300 K.
